# Supplementary material for: Modeling dust sources, transport, and radiative effects at different altitudes over the Tibetan Plateau
Source: Copernicus journal article supplement (doi:10.5194/acp-2019-431), 2019-08-07
Supplement: Supplementary file 1 [file acp-2019-431-supplement.pdf]

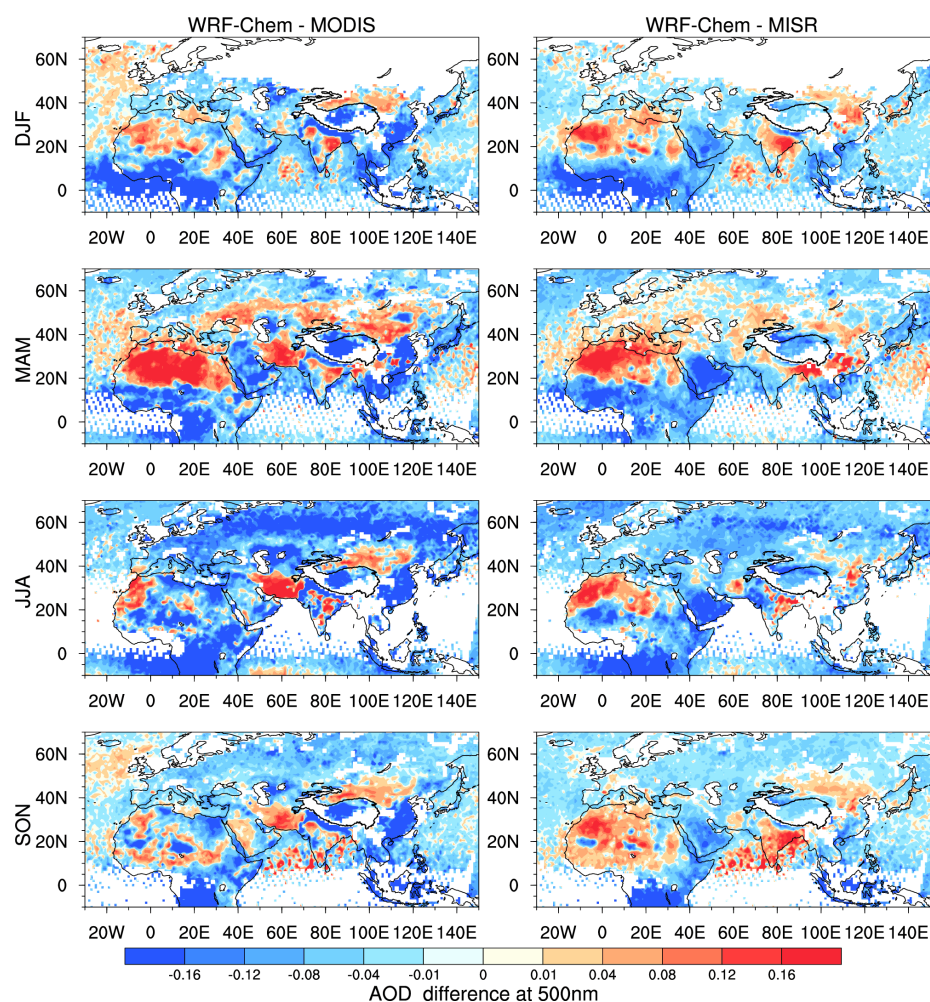

**Figure S1.** Spatial distributions of seasonal mean AOD difference at 550 nm from the retrievals of MODIS and MISR onboard Terra and the WRF-Chem simulation for the period of 2010–2015. The daily results from MISR, MODIS, and WRF-Chem are only sampled for averaging when all of them have valid values at the same location and time.

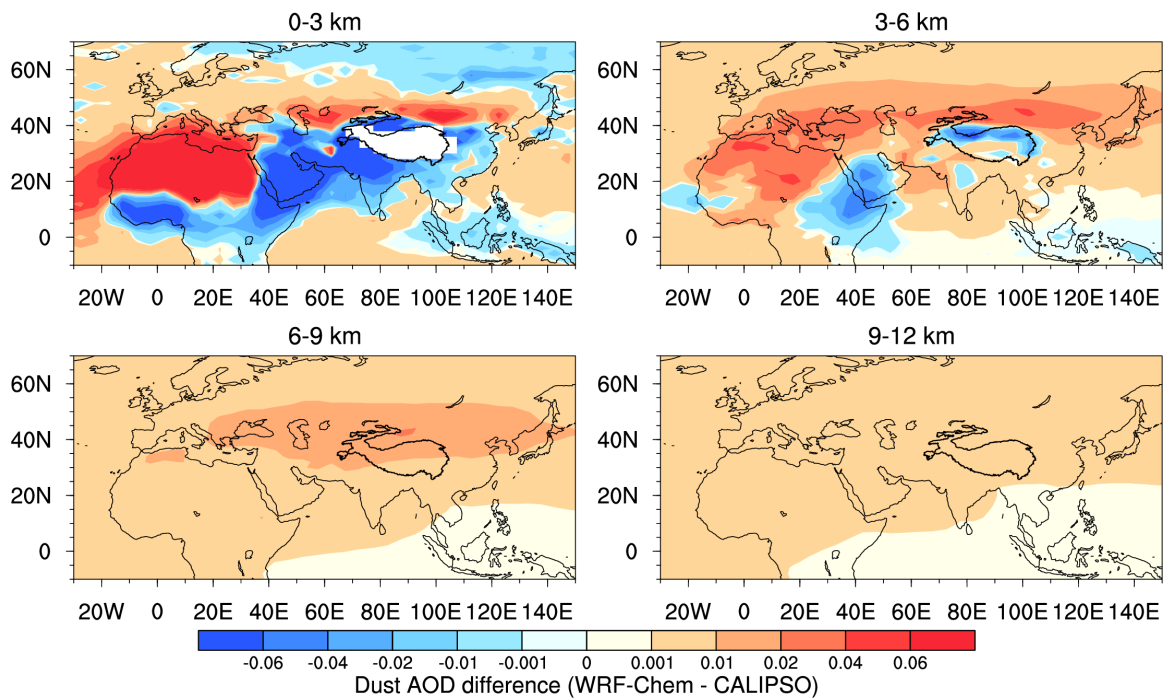

**Figure S2.** Spatial distributions of annual mean dust AOD difference from CALIPSO and WRF-Chem between 0–3 km, 3–6 km, 6–9 km, and 9–12 km for the period of 2010–2015.
